# Supplementary material
Source: Royal Society of Chemistry journal article supplement (doi:10.1039/d6cp00763e)
Supplement: d6cp00763e1.pdf [file d6cp00763e1.pdf]

### S1: RDFs at different simulation durations

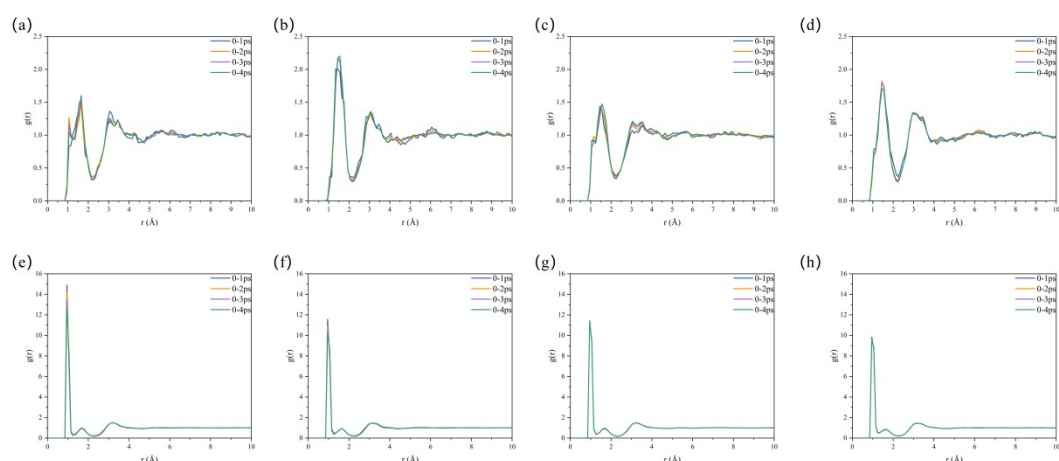

**S1** RDFs at different simulation durations: (a) H–F in the 353 K–23% system; (b) H–F in the 353 K–46% system; (c) H–F in the 453 K–23% system; (d) H–F in the 453 K–46% system; (e) H–O in the 353 K–23% system; (f) H–O in the 353 K–46% system; (g) H–O in the 453 K–23% system; (h) H–O in the 453 K–46% system.

### S2: Peak shape information of F-H in four different systems

|       | 353K-23%P <sub>2</sub> O <sub>5</sub> |        | 353K-46%P <sub>2</sub> O <sub>5</sub> |        | 453K-23%P <sub>2</sub> O <sub>5</sub> |        | 453K-46%P <sub>2</sub> O <sub>5</sub> |        |
|-------|---------------------------------------|--------|---------------------------------------|--------|---------------------------------------|--------|---------------------------------------|--------|
|       | Peak distance                         | g(r)   |
| 0-1ps | 1.65                                  | 1.5995 | 1.45                                  | 2.0093 | 1.45                                  | 1.4376 | 1.45                                  | 1.8185 |
| 0-2ps | 1.65                                  | 1.4875 | 1.45                                  | 2.1246 | 1.55                                  | 1.3710 | 1.45                                  | 1.8275 |
| 0-3ps | 1.65                                  | 1.5541 | 1.45                                  | 2.1754 | 1.55                                  | 1.3455 | 1.45                                  | 1.8040 |
| 0-4ps | 1.65                                  | 1.5610 | 1.45                                  | 2.1743 | 1.55                                  | 1.2991 | 1.45                                  | 1.7083 |

\*The initial values of bond length and bond angle are 3.5Å and 120°.

### S3: Peak shape information of O-H in four different systems

|       | 353K-23%P <sub>2</sub> O <sub>5</sub> |         | 353K-46%P <sub>2</sub> O <sub>5</sub> |         | 453K-23%P <sub>2</sub> O <sub>5</sub> |         | 453K-46%P <sub>2</sub> O <sub>5</sub> |        |
|-------|---------------------------------------|---------|---------------------------------------|---------|---------------------------------------|---------|---------------------------------------|--------|
|       | Peak distance                         | g(r)    | Peak distance                         | g(r)    | Peak distance                         | g(r)    | Peak distance                         | g(r)   |
| 0-1ps | 0.95                                  | 14.9147 | 0.95                                  | 11.5636 | 0.95                                  | 11.2924 | 0.95                                  | 9.8307 |
| 0-2ps | 0.95                                  | 14.2197 | 0.95                                  | 10.9040 | 0.95                                  | 11.3858 | 0.95                                  | 9.6147 |
| 0-3ps | 0.95                                  | 13.3899 | 0.95                                  | 10.3631 | 0.95                                  | 11.4115 | 0.95                                  | 9.5224 |
| 0-4ps | 0.95                                  | 12.8676 | 0.95                                  | 10.1456 | 0.95                                  | 11.3522 | 0.95                                  | 9.5408 |

\*The initial values of bond length and bond angle are 3.5Å and 120°.

### S4: Sensitivity test of H<sub>2</sub>O–H<sub>3</sub>PO<sub>4</sub>–HF system in DPMD( $\tau_{\text{cont}}$ )

| type               | Single factor of key length (fixed key angle value) |       |       |       |       | Single factor of key angle (fixed value of key length) |       |       |       |       |
|--------------------|-----------------------------------------------------|-------|-------|-------|-------|--------------------------------------------------------|-------|-------|-------|-------|
|                    | -0.4                                                | -0.2  | 0     | +0.2  | +0.4  | -20                                                    | -10   | 0     | +10   | +20   |
| P–O⋯H <sub>p</sub> | 1.944                                               | 1.945 | 1.952 | 1.969 | 1.982 | 2.062                                                  | 2.019 | 1.952 | 1.895 | 1.856 |
| P–O⋯H <sub>w</sub> | 2.238                                               | 2.218 | 2.237 | 2.300 | 2.359 | 2.290                                                  | 2.279 | 2.237 | 2.236 | 2.334 |
| P–O⋯H <sub>b</sub> | 1.824                                               | 1.811 | 1.835 | 1.891 | 1.930 | 1.869                                                  | 1.859 | 1.835 | 1.825 | 1.866 |

|                                  |       |       |       |       |       |       |       |       |       |       |
|----------------------------------|-------|-------|-------|-------|-------|-------|-------|-------|-------|-------|
| H <sub>p</sub> ···O <sub>w</sub> | 2.152 | 2.137 | 2.147 | 2.208 | 2.273 | 2.221 | 2.184 | 2.147 | 2.118 | 2.104 |
| H <sub>w</sub> ···O <sub>w</sub> | 2.492 | 2.460 | 2.477 | 2.540 | 2.609 | 2.669 | 2.578 | 2.477 | 2.488 | 2.641 |
| H <sub>h</sub> ···O <sub>w</sub> | 2.127 | 2.078 | 2.078 | 2.128 | 2.172 | 2.166 | 2.115 | 2.078 | 2.098 | 2.198 |
| H <sub>p</sub> ···F              | 4.908 | 4.776 | 4.599 | 4.415 | 4.251 | 5.445 | 4.940 | 4.599 | 4.268 | 3.929 |
| H <sub>w</sub> ···F              | 3.927 | 3.865 | 3.825 | 3.817 | 3.806 | 3.882 | 3.851 | 3.825 | 3.848 | 3.941 |
| H <sub>h</sub> ···F              | 2.570 | 2.538 | 2.520 | 2.521 | 2.527 | 2.595 | 2.541 | 2.520 | 2.541 | 2.610 |

\*The initial values of bond length and bond angle are 3.5Å and 120°.

### S5: Sensitivity test of H2O-H3PO4-HF system in DPMD( $\tau_{int}$ )

| type                             | Single factor of key length (fixed key angle value) |        |        |        |        | Single factor of key angle (fixed value of key length) |        |        |        |        |
|----------------------------------|-----------------------------------------------------|--------|--------|--------|--------|--------------------------------------------------------|--------|--------|--------|--------|
|                                  | -0.4                                                | -0.2   | 0      | +0.2   | +0.4   | -20                                                    | -10    | 0      | +10    | +20    |
| P-O···H <sub>p</sub>             | 13.583                                              | 13.348 | 13.187 | 13.175 | 13.212 | 15.471                                                 | 14.730 | 13.187 | 11.947 | 11.231 |
| P-O···H <sub>w</sub>             | 9.427                                               | 9.303  | 9.240  | 9.310  | 9.423  | 10.038                                                 | 9.624  | 9.240  | 8.780  | 8.285  |
| P-O···H <sub>h</sub>             | 7.934                                               | 7.871  | 7.750  | 7.856  | 7.910  | 8.253                                                  | 8.074  | 7.750  | 7.436  | 7.076  |
| H <sub>p</sub> ···O <sub>w</sub> | 17.117                                              | 16.573 | 16.205 | 16.241 | 16.342 | 17.421                                                 | 16.834 | 16.205 | 15.450 | 14.563 |
| H <sub>w</sub> ···O <sub>w</sub> | 13.678                                              | 13.516 | 13.340 | 13.259 | 13.066 | 14.939                                                 | 14.220 | 13.340 | 12.396 | 11.404 |
| H <sub>h</sub> ···O <sub>w</sub> | 13.443                                              | 13.110 | 12.781 | 12.572 | 12.322 | 13.521                                                 | 13.221 | 12.781 | 12.368 | 11.899 |
| H <sub>p</sub> ···F              | 40.761                                              | 40.105 | 38.904 | 37.889 | 36.063 | 46.009                                                 | 42.359 | 38.904 | 36.332 | 33.969 |
| H <sub>w</sub> ···F              | 27.121                                              | 26.949 | 26.781 | 26.428 | 25.963 | 28.847                                                 | 28.068 | 26.781 | 25.073 | 23.499 |
| H <sub>h</sub> ···F              | 23.650                                              | 23.312 | 22.829 | 22.481 | 21.921 | 25.890                                                 | 24.508 | 22.829 | 22.462 | 22.271 |

\*The initial values of bond length and bond angle are 3.5Å and 120°.

### S6: Sensitivity test of H2O-H3PO4 system in DPMD( $\tau_{cont}$ )

| type                             | Single factor of key length (fixed key angle value) |        |       |       |       | Single factor of key angle (fixed value of key length) |       |       |       |       |
|----------------------------------|-----------------------------------------------------|--------|-------|-------|-------|--------------------------------------------------------|-------|-------|-------|-------|
|                                  | -0.4                                                | -0.2   | 0     | +0.2  | +0.4  | -20                                                    | -10   | 0     | +10   | +20   |
| P-O···H <sub>p</sub>             | 2.066                                               | 2.070  | 2.082 | 2.100 | 2.118 | 2.205                                                  | 2.153 | 2.082 | 2.018 | 1.963 |
| P-O···H <sub>w</sub>             | 2.201                                               | 2.174  | 2.181 | 2.226 | 2.269 | 2.229                                                  | 2.222 | 2.181 | 2.171 | 2.268 |
| P-O···H <sub>h</sub>             | 1.779                                               | 1.770  | 1.777 | 1.802 | 1.826 | 1.798                                                  | 1.792 | 1.777 | 1.761 | 1.782 |
| H <sub>p</sub> ···O <sub>w</sub> | 2.324                                               | 2.300  | 2.288 | 2.306 | 2.335 | 2.354                                                  | 2.320 | 2.288 | 2.266 | 2.243 |
| H <sub>w</sub> ···O <sub>w</sub> | 2.399                                               | 2.343  | 2.333 | 2.375 | 2.425 | 2.461                                                  | 2.398 | 2.333 | 2.356 | 2.483 |
| H <sub>h</sub> ···O <sub>w</sub> | 2.052                                               | 2.0163 | 2.003 | 2.021 | 2.037 | 2.048                                                  | 2.024 | 2.003 | 2.004 | 2.046 |

\*The initial values of bond length and bond angle are 3.5Å and 120°.

### S7: Sensitivity test of H2O-H3PO4 system in DPMD( $\tau_{int}$ )

| type                             | Single factor of key length (fixed key angle value) |        |        |        |        | Single factor of key angle (fixed value of key length) |         |        |        |        |
|----------------------------------|-----------------------------------------------------|--------|--------|--------|--------|--------------------------------------------------------|---------|--------|--------|--------|
|                                  | -0.4                                                | -0.2   | 0      | +0.2   | +0.4   | -20                                                    | -10     | 0      | +10    | +20    |
| P-O···H <sub>p</sub>             | 22.375                                              | 22.242 | 22.289 | 22.382 | 22.603 | 24.557                                                 | 23.596  | 22.289 | 20.996 | 19.907 |
| P-O···H <sub>w</sub>             | 15.581                                              | 15.407 | 15.504 | 15.580 | 15.804 | 16.347                                                 | 16.0190 | 15.504 | 14.904 | 14.168 |
| P-O···H <sub>h</sub>             | 14.373                                              | 14.374 | 14.213 | 14.528 | 14.502 | 14.622                                                 | 14.326  | 14.213 | 14.213 | 14.299 |
| H <sub>p</sub> ···O <sub>w</sub> | 26.542                                              | 26.093 | 25.712 | 25.543 | 25.495 | 26.872                                                 | 26.286  | 25.712 | 25.264 | 24.379 |
| H <sub>w</sub> ···O <sub>w</sub> | 22.099                                              | 21.917 | 21.728 | 21.585 | 21.446 | 23.000                                                 | 22.402  | 21.728 | 20.889 | 20.125 |
| H <sub>h</sub> ···O <sub>w</sub> | 20.459                                              | 20.077 | 19.785 | 19.693 | 19.631 | 20.630                                                 | 20.224  | 19.785 | 19.314 | 18.773 |

**S8: Hydrogen bond lifetime error of DPMD**

|                                  | H <sub>2</sub> O-H <sub>3</sub> PO <sub>4</sub> -HF |                     | H <sub>2</sub> O-H <sub>3</sub> PO <sub>4</sub> |                     |
|----------------------------------|-----------------------------------------------------|---------------------|-------------------------------------------------|---------------------|
|                                  | $\tau_{\text{cont}}$                                | $\tau_{\text{int}}$ | $\tau_{\text{cont}}$                            | $\tau_{\text{int}}$ |
| P-O...H <sub>p</sub>             | 1.952 $\pm$ 0.0041                                  | 13.187 $\pm$ 0.0653 | 2.082 $\pm$ 0.0051                              | 22.289 $\pm$ 0.2760 |
| P-O...H <sub>w</sub>             | 2.237 $\pm$ 0.0080                                  | 9.240 $\pm$ 0.0576  | 2.181 $\pm$ 0.0071                              | 15.504 $\pm$ 0.2102 |
| P-O...H <sub>h</sub>             | 1.835 $\pm$ 0.0067                                  | 7.750 $\pm$ 0.0518  | 1.777 $\pm$ 0.0063                              | 14.213 $\pm$ 0.2472 |
| H <sub>p</sub> ...O <sub>w</sub> | 2.147 $\pm$ 0.0034                                  | 16.205 $\pm$ 0.1266 | 2.288 $\pm$ 0.0043                              | 25.712 $\pm$ 0.2945 |
| H <sub>w</sub> ...O <sub>w</sub> | 2.477 $\pm$ 0.0042                                  | 13.340 $\pm$ 0.0742 | 2.333 $\pm$ 0.0042                              | 21.728 $\pm$ 0.2781 |
| H <sub>h</sub> ...O <sub>w</sub> | 2.078 $\pm$ 0.0038                                  | 12.781 $\pm$ 0.1006 | 2.003 $\pm$ 0.0040                              | 19.785 $\pm$ 0.2762 |
| H <sub>p</sub> ...F              | 4.599 $\pm$ 0.0554                                  | 38.904 $\pm$ 0.2925 | /                                               | /                   |
| H <sub>w</sub> ...F              | 3.825 $\pm$ 0.0322                                  | 26.781 $\pm$ 0.1148 | /                                               | /                   |

\*Unit:ps

**S9 Average number of strong hydrogen bonds of H<sub>2</sub>O-H<sub>3</sub>PO<sub>4</sub>-HF system**

| Type                             | Segment 1           | Segment 2           | Segment 3           | Segment 4          |
|----------------------------------|---------------------|---------------------|---------------------|--------------------|
| P-O...H <sub>p</sub>             | 248.08 $\pm$ 67.7   | 640.5 $\pm$ 70.4    | 674.26 $\pm$ 58.2   | 657.82 $\pm$ 45.7  |
| P-O...H <sub>w</sub>             | 649.24 $\pm$ 398.9  | 246.56 $\pm$ 52.3   | 304.5 $\pm$ 30.1    | 318.92 $\pm$ 26.9  |
| P-O...H <sub>h</sub>             | 197.78 $\pm$ 81.6   | 98.18 $\pm$ 17.0    | 133.38 $\pm$ 18.6   | 137.67 $\pm$ 22.6  |
| H <sub>p</sub> ...O <sub>w</sub> | 601.06 $\pm$ 156.3  | 1093.26 $\pm$ 217.5 | 1434.96 $\pm$ 105.3 | 1596.90 $\pm$ 71.0 |
| H <sub>w</sub> ...O <sub>w</sub> | 3227 $\pm$ 1833.5   | 1060.14 $\pm$ 116.9 | 1254.58 $\pm$ 88.8  | 1365.33 $\pm$ 81.4 |
| H <sub>h</sub> ...O <sub>w</sub> | 1295.92 $\pm$ 340.3 | 659.8 $\pm$ 61.7    | 823.6 $\pm$ 49.4    | 889.02 $\pm$ 45.9  |
| H <sub>p</sub> ...F              | 28.32 $\pm$ 13.5    | 72.72 $\pm$ 25.2    | 118.88 $\pm$ 8.7    | 109.53 $\pm$ 11.4  |
| H <sub>w</sub> ...F              | 347.62 $\pm$ 91.9   | 236.6 $\pm$ 127.7   | 75.94 $\pm$ 9.0     | 72.76 $\pm$ 7.8    |
| H <sub>h</sub> ...F              | 63.24 $\pm$ 29.3    | 36.4 $\pm$ 9.5      | 56.6 $\pm$ 8.9      | 54.84 $\pm$ 7.7    |

**S10 Average number of receptor atoms of H<sub>2</sub>O-H<sub>3</sub>PO<sub>4</sub>-HF system**

| Type           | Segment 1          | Segment 2          | Segment 3          | Segment 4           |
|----------------|--------------------|--------------------|--------------------|---------------------|
| O <sub>p</sub> | 495.16 $\pm$ 222.7 | 251.2 $\pm$ 27.6   | 304.18 $\pm$ 15.3  | 312.7647 $\pm$ 14.5 |
| O <sub>w</sub> | 3428.4 $\pm$ 896.5 | 145.06 $\pm$ 246.5 | 1223.94 $\pm$ 36.0 | 1264.098 $\pm$ 24.2 |
| F              | 154.98 $\pm$ 8.7   | 167.48 $\pm$ 1.3   | 158.66 $\pm$ 3.6   | 154.6275 $\pm$ 1.2  |

**S11 Average number of strong hydrogen bonds of H<sub>2</sub>O-H<sub>3</sub>PO<sub>4</sub> system**

| Type                             | Segment 1              | Segment 2            | Segment 3            | Segment 4            |
|----------------------------------|------------------------|----------------------|----------------------|----------------------|
| P-O...H <sub>p</sub>             | 447.3867 $\pm$ 208.9   | 715.3333 $\pm$ 40.1  | 621 $\pm$ 44.1       | 635.9481 $\pm$ 40.2  |
| P-O...H <sub>w</sub>             | 664.04 $\pm$ 576.5     | 286.4533 $\pm$ 30.5  | 282.7467 $\pm$ 30.4  | 261.7273 $\pm$ 34.9  |
| P-O...H <sub>h</sub>             | 175.0133 $\pm$ 96.8    | 135.44 $\pm$ 18.7    | 136.6933 $\pm$ 18.6  | 136.026 $\pm$ 15.7   |
| H <sub>p</sub> ...O <sub>w</sub> | 939 $\pm$ 192.2        | 1474.6933 $\pm$ 85.4 | 1577.3333 $\pm$ 61.5 | 1595.0779 $\pm$ 54.3 |
| H <sub>w</sub> ...O <sub>w</sub> | 2725.6667 $\pm$ 2047.9 | 1186.7333 $\pm$ 71.6 | 1262.8533 $\pm$ 87.0 | 1281.9091 $\pm$ 84.1 |
| H <sub>h</sub> ...O <sub>w</sub> | 964.5067 $\pm$ 340.2   | 816.2 $\pm$ 62.6     | 925.3733 $\pm$ 42.9  | 978.026 $\pm$ 49.8   |

**S12 Average number of receptor atoms of H<sub>2</sub>O-H<sub>3</sub>PO<sub>4</sub> system**

| Type           | Segment 1          | Segment 2           | Segment 3           | Segment 4           |
|----------------|--------------------|---------------------|---------------------|---------------------|
| O <sub>p</sub> | 507.76 $\pm$ 277.6 | 337.2133 $\pm$ 14.1 | 341.1333 $\pm$ 20.6 | 359.8831 $\pm$ 13.7 |

|                |                  |              |                |                |
|----------------|------------------|--------------|----------------|----------------|
| O <sub>w</sub> | 2867.4533±1250.3 | 1176.92±63.1 | 1208.8133±30.2 | 1185.7403±31.5 |
|----------------|------------------|--------------|----------------|----------------|
